# Supplementary material
Source: PubMed Central journal article supplement (PMC3476537)
Supplement: supp_blood-2011-12-401950_blood-2011-12-401950-1.pdf [file supp_blood-2011-12-401950_blood-2011-12-401950-1.pdf]

## Supplemental Figures and Tables

**Supplemental Table 1. List of donor samples.**

| Sample                       | Age | Gender | Ethnicity | Relative frequency<br>MSI-L (%) | Relative frequency<br>MSI-H (%) | Relative frequency<br>MSI-Any (%) |
|------------------------------|-----|--------|-----------|---------------------------------|---------------------------------|-----------------------------------|
| <b>Umbilical Cord Blood</b>  |     |        |           |                                 |                                 |                                   |
| UBC01                        | 0   | N/R    | N/R       | 12.5                            | 0                               | 12.5                              |
| UBC02                        | 0   | N/R    | N/R       | 50                              | 8.3                             | 58.3                              |
| UBC03                        | 0   | N/R    | N/R       | 20.8                            | 0                               | 20.8                              |
| UBC04                        | 0   | N/R    | N/R       | 33.3                            | 4.2                             | 37.5                              |
| UBC05                        | 0   | N/R    | N/R       | 4.2                             | 0                               | 4.2                               |
| UBC06                        | 0   | N/R    | N/R       | 8.3                             | 0                               | 8.3                               |
| UBC07                        | 0   | N/R    | N/R       | 8.3                             | 0                               | 8.3                               |
| UBC08                        | 0   | N/R    | N/R       | 0                               | 0                               | 0                                 |
| UBC09                        | 0   | N/R    | N/R       | 12.5                            | 0                               | 12.5                              |
| UBC10                        | 0   | N/R    | N/R       | 8.3                             | 4.2                             | 12.5                              |
| UBC11                        | 0   | F      | N/R       | 20.8                            | 0                               | 20.8                              |
| UBC12                        | 0   | N/R    | N/R       | 29.2                            | 8.3                             | 37.5                              |
| UBC13                        | 0   | N/R    | N/R       | 20.8                            | 12.5                            | 33.3                              |
| UBC14                        | 0   | N/R    | N/R       | 29.2                            | 8.3                             | 37.5                              |
| UBC15                        | 0   | N/R    | N/R       | 45.8                            | 16.7                            | 62.5                              |
| <b>Bone Marrow Aspirates</b> |     |        |           |                                 |                                 |                                   |
| Sample                       | Age | Gender | Ethnicity | Relative frequency<br>MSI-L (%) | Relative frequency<br>MSI-H (%) | Relative frequency<br>MSI-Any (%) |
| BMA01                        | 23  | N/R    | N/R       | 12.5                            | 0                               | 12.5                              |
| BMA02                        | 23  | F      | C         | 37.5                            | 0                               | 37.5                              |
| BMA03                        | 25  | F      | C         | 0                               | 0                               | 0                                 |
| BMA04                        | 25  | F      | AA        | 8.3                             | 0                               | 8.3                               |
| BMA05                        | 26  | F      | C         | 16.7                            | 0                               | 16.7                              |
| BMA06                        | 27  | F      | C         | 33.3                            | 4.2                             | 37.5                              |
| BMA07                        | 27  | M      | N/R       | 20.8                            | 12.5                            | 33.3                              |
| BMA08                        | 28  | M      | C         | 45.8                            | 0                               | 45.8                              |
| BMA09                        | 29  | F      | C         | 37.5                            | 8.3                             | 45.8                              |
| BMA10                        | 30  | M      | C         | 37.5                            | 0                               | 37.5                              |
| BMA11                        | 31  | F      | C         | 4.2                             | 0                               | 4.2                               |
| BMA12                        | 33  | F      | C         | 0                               | 16.7                            | 16.7                              |
| BMA13                        | 35  | F      | N/R       | 12.5                            | 12.5                            | 25                                |
| BMA14                        | 43  | M      | C         | 16.7                            | 4.2                             | 20.8                              |
| BMA15                        | 45  | M      | N/R       | 25                              | 4.2                             | 29.2                              |
| BMA16                        | 46  | F      | AA        | 41.7                            | 12.5                            | 54.2                              |
| BMA17                        | 47  | F      | C         | 54.2                            | 0                               | 54.2                              |
| BMA18                        | 47  | N/R    | N/R       | 41.7                            | 8.3                             | 50                                |
| BMA19                        | 48  | M      | N/R       | 16.7                            | 4.2                             | 20.8                              |
| BMA20                        | 50  | F      | C         | 16.7                            | 16.7                            | 33.4                              |
| BMA21                        | 51  | M      | C         | 0                               | 0                               | 0                                 |
| BMA22                        | 52  | F      | N/R       | 16.7                            | 0                               | 16.7                              |
| BMA23                        | 54  | F      | N/R       | 12.5                            | 4.2                             | 16.7                              |
| BMA24                        | 55  | M      | C         | 25                              | 4.2                             | 29.2                              |
| BMA25                        | 63  | F      | N/R       | 4.2                             | 0                               | 4.2                               |
| BMA26                        | 74  | M      | N/R       | 12.5                            | 4.2                             | 16.7                              |
| BMA27                        | 81  | F      | N/R       | 20                              | 6.7                             | 26.7                              |
| BMA28                        | 83  | F      | N/R       | 8.3                             | 0                               | 8.3                               |
| BMA29                        | 84  | M      | C         | 20.8                            | 50                              | 70.8                              |
| <b>Bone Core Samples</b>     |     |        |           |                                 |                                 |                                   |
| Sample                       | Age | Gender | Ethnicity | Relative frequency<br>MSI-L (%) | Relative frequency<br>MSI-H (%) | Relative frequency<br>MSI-Any (%) |
| BC01                         | 48  | M      | C         | 37.5                            | 4.2                             | 41.7                              |
| BC02                         | 52  | M      | N/R       | 37.5                            | 45.8                            | 83.3                              |
| BC03                         | 64  | M      | C         | 33.3                            | 29.2                            | 62.5                              |
| BC04                         | 64  | M      | C         | 25                              | 16.7                            | 41.7                              |
| BC05                         | 64  | M      | N/R       | 29.2                            | 16.7                            | 45.9                              |
| BC06                         | 68  | M      | C         | 29.2                            | 4.2                             | 33.4                              |
| BC07                         | 70  | M      | AA        | 8.3                             | 0                               | 8.3                               |
| BC08                         | 73  | N/R    | N/R       | 0                               | 0                               | 0                                 |
| BC09                         | 74  | M      | N/R       | 12.5                            | 4.2                             | 16.7                              |
| BC10                         | 75  | N/R    | N/R       | 29.2                            | 54.2                            | 83.4                              |
| BC11                         | 76  | F      | N/R       | 37.5                            | 33.3                            | 70.8                              |
| BC12                         | 78  | M      | C         | 16.7                            | 4.2                             | 20.9                              |
| BC13                         | 79  | F      | C         | 41.7                            | 12.5                            | 54.2                              |
| BC14                         | 80  | M      | C         | 47.8                            | 0                               | 47.8                              |
| BC15                         | 82  | M      | C         | 29.2                            | 0                               | 29.2                              |
| BC16                         | 83  | M      | C         | 29.2                            | 41.7                            | 70.9                              |
| BC17                         | 84  | N/R    | N/R       | 45.8                            | 16.7                            | 62.5                              |
| BC18                         | 85  | F      | C         | 29.2                            | 16.7                            | 45.9                              |

The relative frequency =  $f / n$ , where  $f$  = total number of all MSI-L, -H, or -Any CFC clones from each donor and  $n$  = the total number of all CFC clone analyzed from each donor. M = Male, F = Female, C = Caucasian, AA = African American, N/R = not reporting

**Supplemental Table 2. Primers used to amplify the *MLH1* promoter region after bisulfite modification and sequence subclones.**

| Name    | Sequence                             | Length (bp) | Tm (C°) |
|---------|--------------------------------------|-------------|---------|
| MLH1-mF | 5' ACTCAAATCCTCTACCTTATAATATCTAAA 3' | 31          | 53.3°C  |
| MLH1-mR | 5' GTTAAATTTTTAATTTTGTGGGTTGTTGGG 3' | 31          | 57.1°C  |
| M13-F   | 5' CCCAGTCACGACGTTGTAAAACG 3'        | 23          | 65.0°C  |
| M13-R   | 5' AGCGGATAACAATTTACACAAAAGG 3'      | 25          | 61.0°C  |

### Supplemental Figures

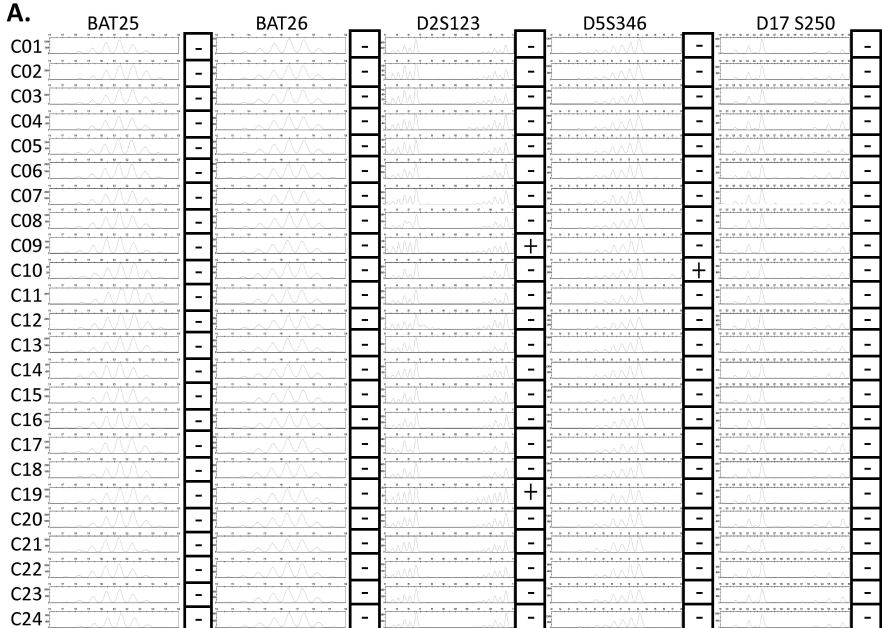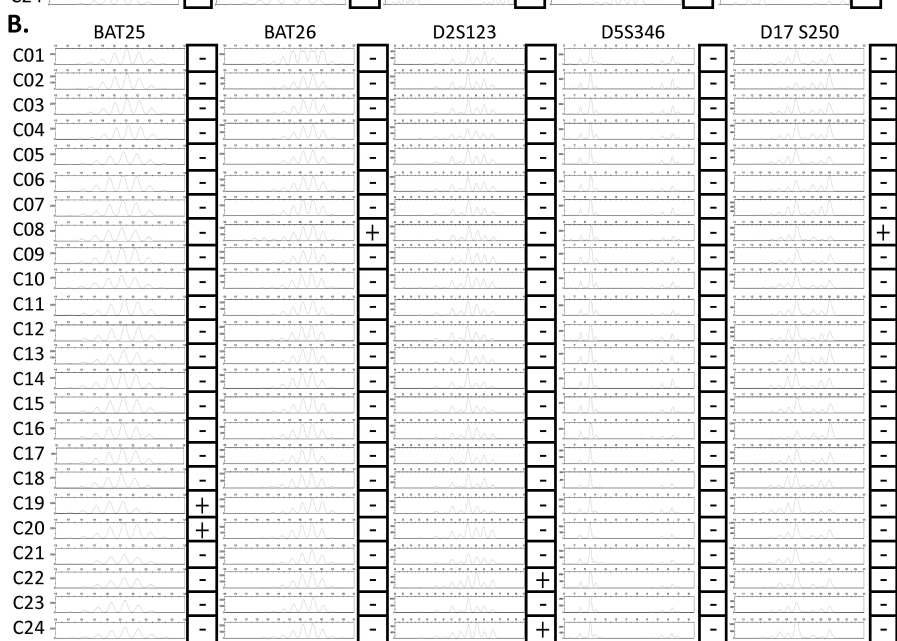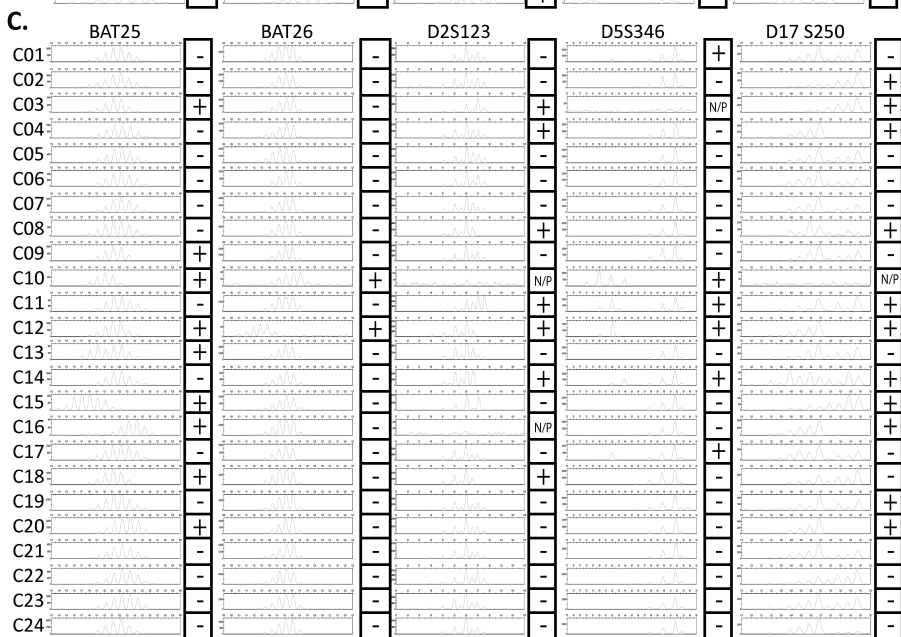

**Supplemental Figure 1.** Electropherogram images depicting the PCR fragment patterns of each microsatellite locus tested in each CFC clone from three donors; A) UCB01 (0 yrs), B) BMA14 (43 yrs), and C) BMA29 (84 yrs).

**Supplemental Figure 2**

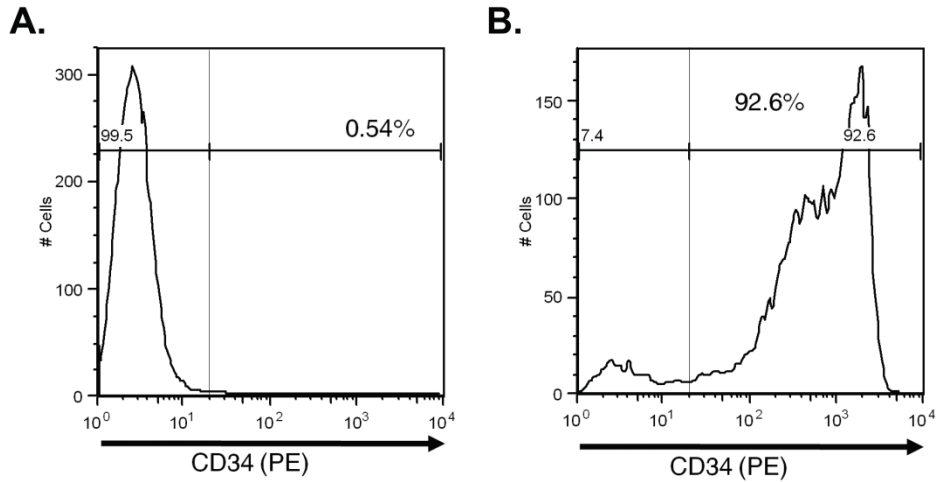

**Supplemental Figure 2. Analysis of CD34+ purity.** Representative FACs analysis of CD34<sup>+</sup> cell purity after isolation by magnetic separation of A) unbound fraction and B) column bound cell fraction.

**Supplemental Figure 3**

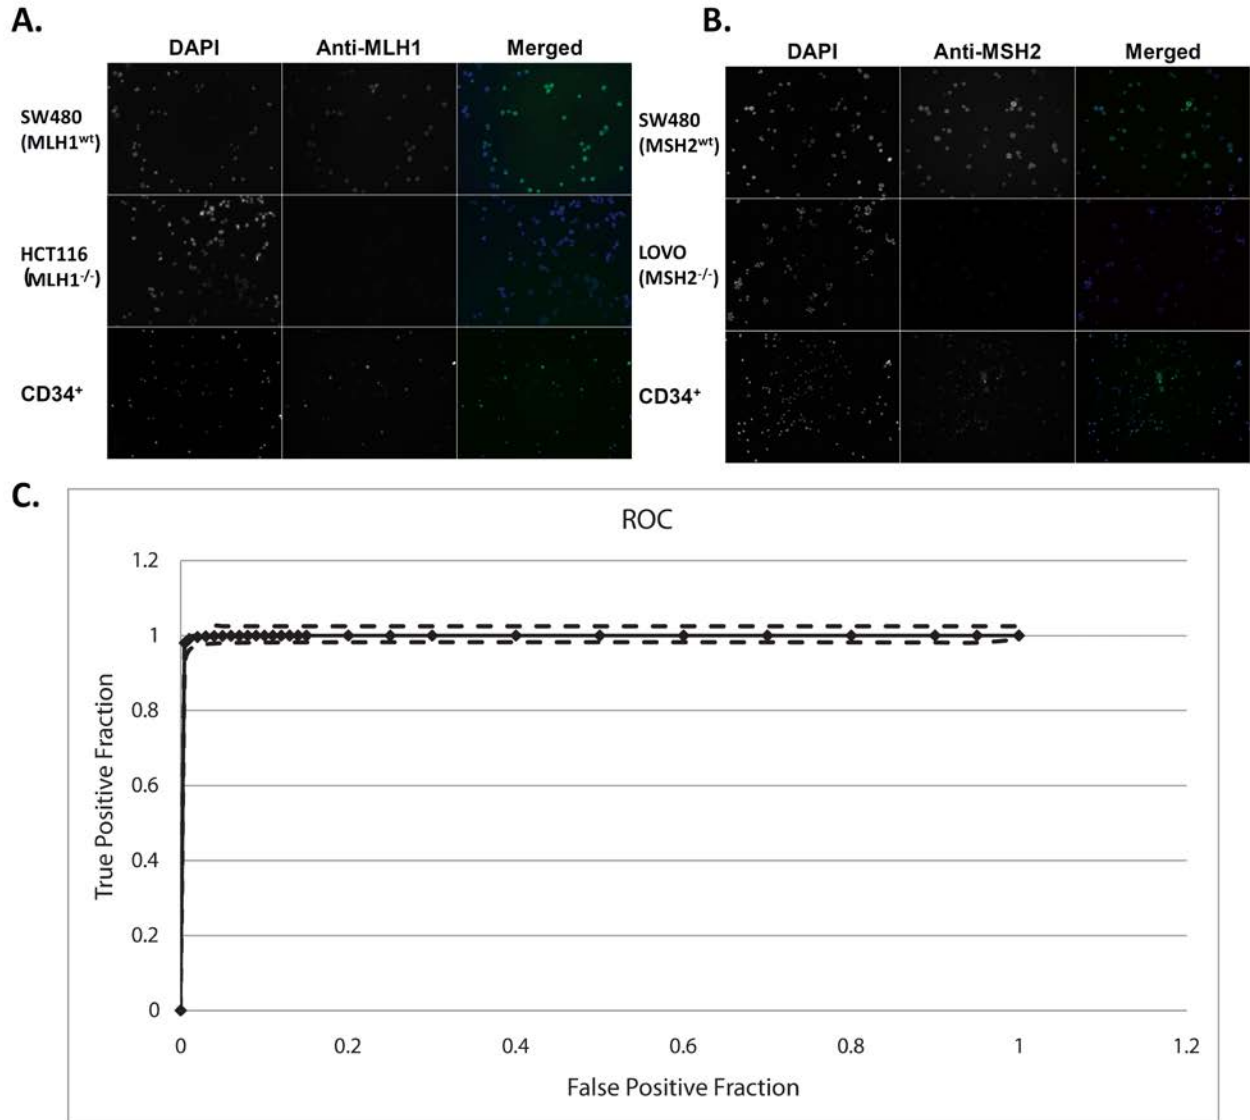

**Supplemental Figure 3 Immunofluorescent staining of CD34<sup>+</sup> and control cell lines.** Panels in A) illustrate representative black/white images of DAPI (left), *MLH1* (center) antibody staining, and merged false color (right) images of CD34<sup>+</sup> (bottom), HCT116 (*MLH1*<sup>-/-</sup>) (middle), and SW480 (*MLH1*<sup>wt</sup>) (top) cells. Panels in B) illustrate representative black/white images of DAPI (left), *MSH2* (center) antibody staining, and merged false color (right) images in CD34<sup>+</sup> (bottom), LoVo (*MSH2*<sup>-/-</sup>) (center), and SW480 (*MSH2*<sup>wt</sup>) (top) cells. Blue represents DAPI and green *MLH1* or *MSH2* antibody. The graph in C) shows an example of one ROC curve derived from fluorescent ratios obtained from the immunofluorescent staining of control cell lines. Plotted along the X-axis is 1-false positive fraction while the True positive fraction is plotted on the Y-axis for every theoretical threshold. The optimal threshold value obtained from this staining was, 0.365.
